# Supplementary material for: Discovery and validation of potential urinary biomarkers for bladder cancer diagnosis using a pseudotargeted GC-MS metabolomics method
Source: PubMed Central journal article supplement (PMC5400539; doi:10.18632/oncotarget.14988), 2017-02-01
Supplement: oncotarget-08-20719-s001.pdf [file oncotarget-08-20719-s001.pdf]

# Discovery and validation of potential urinary biomarkers for bladder cancer diagnosis using a pseudotargeted GC-MS metabolomics method

## Supplementary Materials

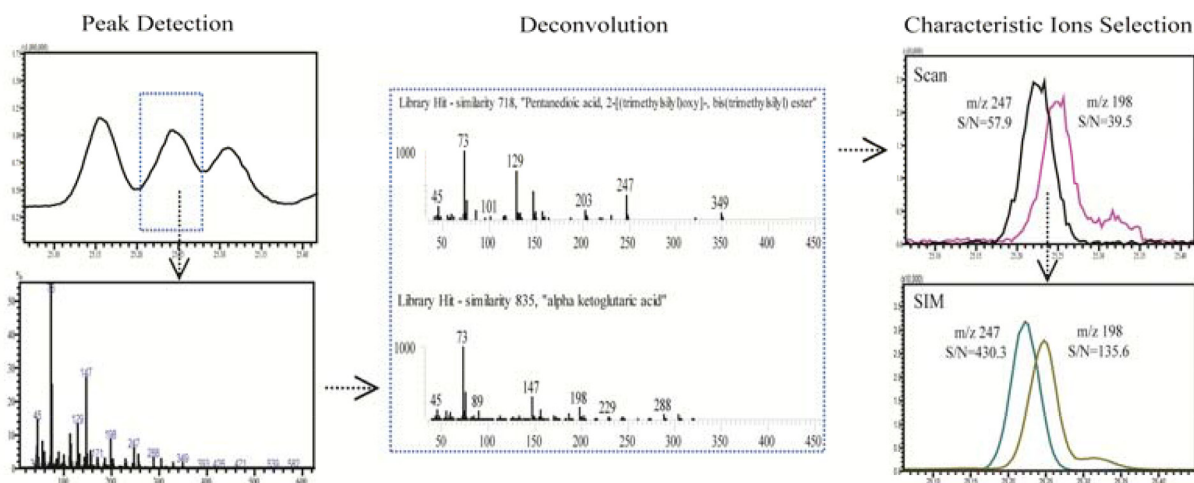

Supplementary Figure 1: An example of the characteristic ion selection.

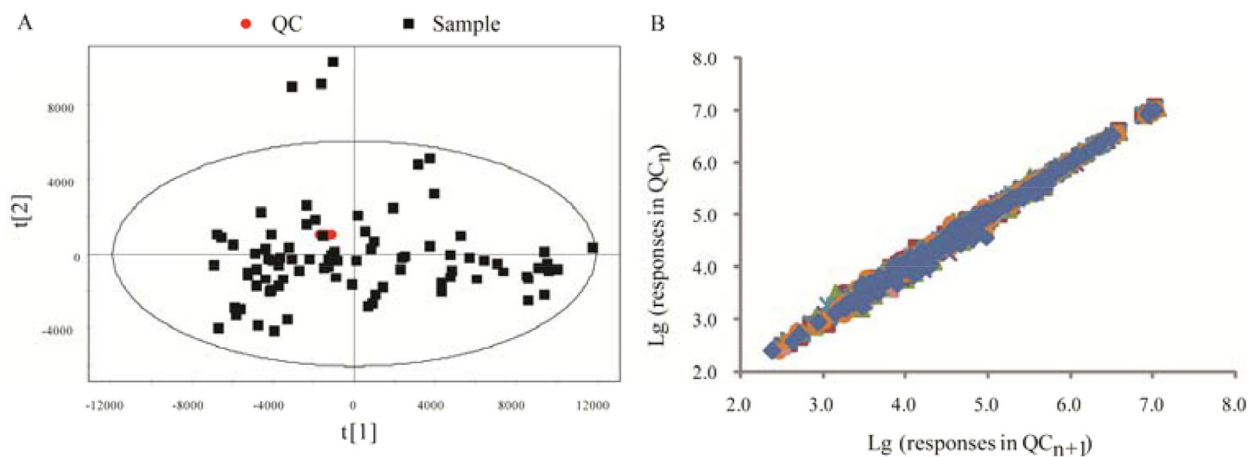

Supplementary Figure 2: Quality monitoring of the entire analysis process. (A) PCA score scatter plots of the samples and QCs. (B) Scatter plots of the peaks in QC<sub>n</sub> and QC<sub>n+1</sub> (n = 1, 2, ..., 9).

**Supplementary Table 1: Metabolites identified by the developed urinary pseudotargeted metabolomics method.** See Supplementary\_Table\_1

**Supplementary Table 2: Differential metabolites and related pathways in the discovery and external validation sets.** See Supplementary\_Table\_2
